# Supplementary material
Source: publisher figshare collection journal article supplement (https://geolsoc.figshare.com/ndownloader/files/34318108)
Supplement: Supplementary file 1 [file 34318108]

## Sheet: Foglio1
	Table S5
		Structural set	Cal	Replicates	d13C (PDB)	d18O (PDB)	d18O (SMOW)	D47 CDES	T (C°)	Delta 18O fluid (SMOW) (O'Neil et al. 1969)	Mean (temperature)	SD (Temperature)	CL 95% (Temperature)	Mean (Delta 18O fluid)	SD (Delta 18O fluid)	CL 95% (Delta 18O fluid)
	PA5.20	V1	Cal-1a	10	1.73	-2.65	28.19	0.542	72.7752	7.48619	102.923	15.6102	6.30508	11.4241	1.7427	0.703893
					1.76	-2.62	28.22	0.497	95.5874	10.326
					1.75	-2.64	28.2	0.486	101.885	10.9945
					1.73	-2.71	28.13	0.498	95.0305	10.175
					1.73	-2.76	28.08	0.528	79.4137	8.2518
					1.7	-2.79	28.04	0.512	87.4895	9.21163
					1.77	-2.63	28.2	0.525	80.8866	8.55677
					1.77	-2.68	28.16	0.433	137.513	14.2774
					1.76	-2.66	28.18	0.469	112.286	12.0393
					1.71	-2.8	28.04	0.453	122.91	12.9042
	PA5.19	V1	Cal-1a	9	1.66	-2.27	28.58	0.475	108.517	12.0571
					1.65	-2.25	28.6	0.454	122.22	13.3932
					1.67	-2.17	28.68	0.46	118.155	13.0957
					1.6	-2.45	28.39	0.492	98.4105	10.8059
					1.69	-2.22	28.63	0.521	82.8795	9.22841
					1.65	-2.33	28.52	0.474	109.138	12.0607
					1.66	-2.23	28.62	0.455	121.534	13.3502
					1.68	-2.18	28.67	0.457	120.172	13.274
					1.66	-2.22	28.63	0.465	114.862	12.733
	PA7.8	V1	Cal-1a	7	1.13	-1.51	29.37	0.503	92.2833	11.0804
					1.13	-1.53	29.34	0.48	105.459	12.4914
					1.11	-1.56	29.31	0.468	112.925	13.2143
					1.15	-1.51	29.36	0.488	100.716	12.0098
					1.15	-1.46	29.42	0.504	91.7412	11.0669
					1.15	-1.47	29.41	0.493	97.8407	11.7458
					1.14	-1.51	29.36	0.501	93.3748	11.1958
	PA7.31	CT slickenfibers	Cal-1 "type"	9	1.08	-3.64	27.16	0.466	114.213	11.2231	91.9728	14.4724	6.97549	8.48414	1.80318	0.869104
					1.1	-3.6	27.21	0.492	98.4105	9.64603
					1.09	-3.61	27.2	0.5	93.9242	9.13634
					1.1	-3.65	27.16	0.472	110.388	10.8476
					1.1	-3.64	27.16	0.503	92.2833	8.90967
					1.09	-3.64	27.17	0.502	92.8278	8.98195
					1.09	-3.6	27.21	0.487	101.299	9.95857
					1.09	-3.6	27.21	0.505	91.2015	8.83387
					1.11	-3.57	27.24	0.51	88.5384	8.55114
	PA3.21	CT slickenfibers	Cal-1 "type"	10	1.71	-3.85	26.95	0.556	66.4982	5.39948
					1.69	-3.88	26.92	0.522	82.3781	7.4883
					1.7	-3.85	26.95	0.476	107.9	10.3907
					1.69	-3.88	26.92	0.483	103.66	9.92348
					1.72	-3.83	26.97	0.539	74.1662	6.47765
					1.66	-4.04	26.76	0.521	82.8795	7.39368
					1.69	-3.93	26.87	0.552	68.2567	5.57012
					1.69	-3.86	26.94	0.519	83.8886	7.69504
					1.7	-3.86	26.94	0.562	63.9107	5.01635
					1.71	-3.87	26.94	0.486	101.885	9.75561
	PA9.10C	VT (Fillière Fault	Cal-1 "type"	10	0.4	-2.99	27.84	0.484	103.065	10.7657				9.75376	0.989353	0.707741
					0.41	-3.02	27.8	0.503	92.2833	9.5383
					0.41	-2.96	27.87	0.523	81.8788	8.3579
					0.38	-3.05	27.78	0.498	95.0305	9.83115
					0.39	-3.08	27.75	0.489	100.136	10.3644
					0.36	-3.06	27.77	0.465	114.862	11.8863
					0.41	-3	27.83	0.512	87.4895	9.00548
					0.26	-3.44	27.37	0.492	98.4105	9.80329
					0.4	-3.08	27.75	0.507	90.1292	9.23926
					0.36	-3.01	27.82	0.516	85.4186	8.74586
	PA3.8	V2	Cal-1b	7	1.21	-3.21	27.61	0.508	89.5966	9.03932	104.325	11.5685	4.31974	10.7308	1.32595	0.495119
					1.05	-3.04	27.79	0.515	85.933	8.77886
					1.17	-3.19	27.64	0.483	103.66	10.6316
					1.11	-3.09	27.73	0.451	124.301	12.7241
					1.09	-3.19	27.64	0.476	107.9	11.0696
					1.2	-3.03	27.8	0.492	98.4105	10.2259
					1.14	-3.71	27.09	0.481	104.857	10.2157
	PA8.16	VF3_TF2	Cal-1b	7	1.44	-2.44	28.4	0.477	107.285	11.7547
					1.44	-2.45	28.4	0.501	93.3748	10.2527
					1.46	-2.42	28.42	0.473	109.761	12.0249
					1.42	-2.44	28.4	0.478	106.674	11.6921
					1.43	-2.4	28.44	0.446	127.842	13.7375
					1.46	-2.41	28.44	0.51	88.5384	9.7293
					1.45	-2.4	28.45	0.501	93.3748	10.3018
	PA8.24	VF1_TF1	Cal-1b	8	0.66	-3.54	27.27	0.508	89.5966	8.70546
					0.66	-3.57	27.24	0.466	114.213	11.3018
					0.66	-3.56	27.25	0.483	103.66	10.248
					0.68	-3.59	27.22	0.48	105.459	10.4061
					0.68	-3.65	27.16	0.462	116.828	11.4735
					0.66	-3.58	27.23	0.489	100.136	9.85321
					0.28	-4.61	26.17	0.5	93.9242	8.12445
					0.72	-3.44	27.38	0.469	112.286	11.2519
	PA8.25	VF3_TF1	Cal-1b	8	0.66	-2.97	27.86	0.487	101.299	10.5977
					0.67	-2.98	27.85	0.516	85.4186	8.7753
					0.66	-3.08	27.75	0.485	102.474	10.6146
					0.66	-3.08	27.75	0.49	99.558	10.3019
					0.67	-3.05	27.77	0.46	118.155	12.1995
					0.66	-3.01	27.82	0.488	100.716	10.4958
					0.67	-2.94	27.89	0.459	118.824	12.3803
					0.72	-2.93	27.9	0.449	125.706	13.0171
	PA8.12	V4	Cal-2	7	0.29	-5.42	25.33	0.596	50.288	1.33105	68.6193	20.1264	4.87162	-3.28514	5.76632	1.39575
					0.33	-5.4	25.36	0.616	43.0074	0.121397
					0.26	-5.4	25.36	0.584	54.9055	2.10445
					0.31	-5.41	25.34	0.629	38.5305	-0.702589
					0.34	-5.44	25.31	0.641	34.5624	-1.47383
					0.48	-5.4	25.35	0.6	48.7917	1.10267
					0.34	-5.39	25.37	0.591	52.1882	1.68009
	PA8.14B	VF1_TF2	Cal-2	7	2.08	-13.3	17.21	0.539	74.1662	-3.0876
					2.16	-14.54	15.93	0.504	91.7412	-2.18257
					2.14	-14.57	15.9	0.533	76.9991	-4.0016
					2.13	-14.5	15.97	0.543	72.3153	-4.54936
					2.14	-14.53	15.95	0.565	62.6389	-5.92365
					2.15	-14.44	16.03	0.484	103.065	-0.848135
					2.17	-14.45	16.03	0.49	99.558	-1.21916
	PA3.3B_core	V1	Cal-2	4	3.46	-10.69	19.9	0.621	41.2628	-5.51206
					3.33	-10.74	19.85	0.526	80.3936	0.304366
					3.29	-11.02	19.56	0.564	63.0613	-2.32962
					3.32	-10.03	20.58	0.602	48.0512	-3.67788
	PA6.7	V4	Cal-2	9	1.06	-16.32	14.1	0.537	75.1028	-6.01249
					1.09	-16.32	14.09	0.583	55.2993	-8.84859
					1.08	-16.29	14.13	0.56	64.7666	-7.39729
					1.03	-16.33	14.09	0.552	68.2567	-6.94479
					1.02	-16.33	14.09	0.516	85.4186	-4.72934
					1.04	-16.49	13.92	0.577	57.6921	-8.64661
					0.83	-16.45	13.96	0.648	32.3165	-12.9551
					1.12	-16.31	14.11	0.551	68.7006	-6.86373
					1.06	-16.36	14.05	0.619	41.9571	-11.0939
					1.01	-16.56	13.85	0.573	59.3167	-8.46958
					1.17	-16.23	14.19	0.525	80.8866	-5.18558
	PA5.17	V5	Cal-2	9	3.49	-15.07	15.39	0.55	69.1462	-5.54865
					3.57	-15.12	15.33	0.56	64.7666	-6.22277
					3.66	-15.07	15.38	0.543	72.3153	-5.12745
					3.58	-15.02	15.44	0.508	89.5966	-2.91075
					3.19	-15.06	15.39	0.562	63.9107	-6.28707
					3.63	-15.05	15.41	0.495	96.7089	-2.13753
					3.59	-15.08	15.37	0.548	70.0428	-5.44512
					3.66	-15.05	15.41	0.512	87.4895	-3.18705
	PA7.10C	Fault rock TF2	Cal-2	7	0.66	-3.54	27.27	0.508	89.5966	8.70546
					0.66	-3.57	27.24	0.466	114.213	11.3018
					0.66	-3.56	27.25	0.483	103.66	10.248
					0.68	-3.59	27.22	0.48	105.459	10.4061
					0.68	-3.65	27.16	0.462	116.828	11.4735
					0.66	-3.58	27.23	0.489	100.136	9.85321
					0.28	-4.61	26.17	0.5	93.9242	8.12445
					0.72	-3.44	27.38	0.469	112.286	11.2519
	PA5.6	Fault rock TF2	Cal-2	12	5.69	-13.82	16.67	0.594	51.0441	-7.00333
					5.6	-13.86	16.63	0.569	60.9654	-5.50456
					5.54	-13.87	16.62	0.532	77.4781	-3.23401
					5.49	-13.78	16.72	0.544	71.8572	-3.87618
					5.4	-13.95	16.54	0.582	55.6945	-6.3925
					5.6	-13.92	16.57	0.557	66.0628	-4.8243
					5.53	-13.78	16.72	0.585	54.5131	-6.4011
					5.59	-13.9	16.59	0.607	46.2223	-7.88016
					5.59	-13.82	16.67	0.575	58.5014	-5.83475
					5.41	-14.11	16.38	0.579	56.8887	-6.36439
					5.4	-13.75	16.75	0.562	63.9107	-4.95611
					5.53	-13.83	16.66	0.619	41.9571	-8.54859
	PA3.16	VF1_TF2	Cal-2	10	2.5	-16.02	14.4	0.555	66.9353	-6.82568
					2.59	-15.83	14.6	0.556	66.4982	-6.69135
					2.52	-15.99	14.43	0.526	80.3936	-5.01176
					2.64	-15.83	14.6	0.537	75.1028	-5.5224
					2.67	-15.84	14.59	0.564	63.0613	-7.19291
					2.69	-15.84	14.59	0.556	66.4982	-6.70114
					2.6	-15.74	14.69	0.587	53.7326	-8.50769
					2.6	-15.73	14.7	0.582	55.6945	-8.19099
					2.57	-15.85	14.58	0.607	46.2223	-9.84178
					2.68	-15.75	14.69	0.557	66.0628	-6.66473
					2.68	-15.8	14.64	0.609	45.4994	-9.90581
	PA8.26	VF4_TF1	Cal-3	9	-5	-13.03	17.49	0.613	44.0682	-7.37057	52.1405	13.2024	4.75997	-8.09856	1.78282	0.642774
					-5.07	-13.12	17.39	0.63	38.1939	-8.51204
					-5.03	-13.08	17.44	0.662	27.9684	-10.4255
					-5.03	-13.13	17.38	0.627	39.2069	-8.33765
					-5.05	-13.04	17.47	0.639	35.2132	-8.98634
					-5.05	-13.16	17.35	0.635	36.5274	-8.85784
					-5.02	-13	17.52	0.591	52.1882	-5.98854
					-4.99	-13.05	17.46	0.622	40.9173	-7.95267
					-5	-12.98	17.54	0.584	54.9055	-5.53819
	PA3.1	V5	Cal-3	6	-2.75	-15.29	15.16	0.649	31.9997	-11.8481
					-2.73	-15.29	15.16	0.572	59.7266	-7.12696
					-2.76	-15.39	15.05	0.598	49.5372	-8.83105
					-2.72	-15.2	15.25	0.571	60.138	-6.97747
					-2.84	-15.23	15.22	0.626	39.5467	-10.3818
					-2.69	-15.26	15.19	0.608	45.8602	-9.30779
	PA5.8	V5	Cal-3	9	-3.13	-15.96	14.47	0.566	62.2182	-7.43323
					-3.08	-15.96	14.47	0.557	66.0628	-6.8801
					-3.12	-15.91	14.52	0.58	56.4892	-8.24416
					-3.08	-15.83	14.6	0.572	59.7266	-7.67466
					-3.15	-15.86	14.57	0.59	52.5722	-8.80903
					-3.12	-15.91	14.52	0.596	50.288	-9.22593
					-3.14	-15.97	14.45	0.533	76.9991	-5.4232
					-3.09	-15.9	14.53	0.541	73.237	-5.83721
					-3.12	-15.91	14.52	0.558	65.6291	-6.89263
	PA6.13	V5	Cal-3	7	-3.36	-15.99	14.44	0.666	26.7599	-13.5876
					-3.2	-15.69	14.74	0.563	63.4852	-6.98467
					-3.33	-15.76	14.67	0.543	72.3153	-5.82311
					-3.15	-15.78	14.65	0.557	66.0628	-6.70389
					-3.16	-15.76	14.67	0.574	58.9083	-7.72905
					-3.13	-15.73	14.71	0.603	47.6829	-9.46968
					-3.21	-15.72	14.72	0.565	62.6389	-7.12717
					-3.26	-15.73	14.7	0.593	51.4241	-8.8661
	PA6.12	V6	Cal-5	7	1.81	-4.68	26.09	0.533	76.9991	5.98877	67.0581	12.7004	10.6178	4.38081	2.01589	1.68533
					1.8	-4.66	26.11	0.594	51.0441	2.21686
					1.78	-4.69	26.08	0.517	84.9064	6.97581
					1.77	-4.72	26.06	0.517	84.9064	6.95618
					1.8	-4.74	26.03	0.571	60.138	3.56652
					1.76	-4.69	26.08	0.566	62.2182	3.9261
					1.79	-4.66	26.11	0.584	54.9055	2.83744
	PA6.14	V6	Cal-5	8	-0.42	-4.9	25.87	0.576	58.096	3.09951
					-0.35	-4.89	25.88	0.563	63.4852	3.91684
					-0.42	-4.94	25.83	0.51	88.5384	7.16679
					-0.42	-4.94	25.83	0.537	75.1028	5.48487
					-0.4	-4.95	25.82	0.558	65.6291	4.16887
					-0.41	-4.94	25.82	0.517	84.9064	6.72065
					-0.42	-4.91	25.86	0.587	53.7326	2.40694
					-0.41	-4.93	25.84	0.621	41.2628	0.27994
	PA3.8	HR	HR	9	1.62	-4.21	26.58	0.567	61.799	4.35313	51.0352	14.1485	5.01685	2.80507	1.61788	0.573675
					1.63	-4.18	26.61	0.592	51.8055	2.82936
					1.62	-4.14	26.65	0.584	54.9055	3.36519
					1.63	-4.2	26.59	0.561	64.3378	4.73602
					1.64	-4.18	26.61	0.627	39.2069	0.659031
					1.63	-4.18	26.61	0.578	57.2897	3.69882
					1.36	-4.98	25.78	0.585	54.5131	2.45287
					1.7	-4.07	26.72	0.628	38.8681	0.704304
					1.62	-4.22	26.57	0.636	36.1972	0.0627381
	PA7.31	HR	HR	9	0.98	-5.11	25.65	0.616	43.0074	0.404259
					0.99	-5.11	25.65	0.537	75.1028	5.30844
					0.97	-5.14	25.62	0.546	70.9464	4.71914
					0.97	-5.11	25.65	0.601	48.4208	1.33359
					0.97	-5.13	25.63	0.588	53.3444	2.12017
					0.94	-5.14	25.62	0.565	62.6389	3.53815
					0.98	-5.08	25.68	0.581	56.0911	2.60337
					0.95	-5.13	25.63	0.552	68.2567	4.35584
					0.96	-5.09	25.67	0.616	43.0074	0.423767
	PA8.11	HR	HR	8	2.22	-2.38	28.47	0.603	47.6829	3.96243
					2.21	-2.35	28.5	0.586	54.1222	5.0488
					2.22	-2.38	28.47	0.622	40.9173	2.78233
					2.21	-2.43	28.41	0.601	48.4208	4.02815
					2.2	-2.45	28.4	0.599	49.1638	4.1427
					2.23	-2.37	28.47	0.615	43.3598	3.21695
					2.22	-2.38	28.46	0.662	27.9684	0.292728
					2.23	-2.37	28.47	0.638	35.5402	1.78965
